# Supplementary material
Source: publisher site journal article supplement (https://www.spandidos-publications.com/8385/downloadSupplementary)

Figure S1. (A, C and E) Radiation planning CT (May 2023) with the gross tumor volume of the tumor bed outlined in red, the clinical target volume 1/high-risk clinical volume in green and planned gross tumor volume in blue. (B, D and F) Positron emission tomography-CT scan at the time of recurrence (February 2024), with the recurrent lesion (near the optic nerve) marked by red arrows. Due to imaging positional differences, anatomical alignment was used for comparison. This figure shows the spatial relationship between the recurrence and irradiated area. CT, computed tomography.

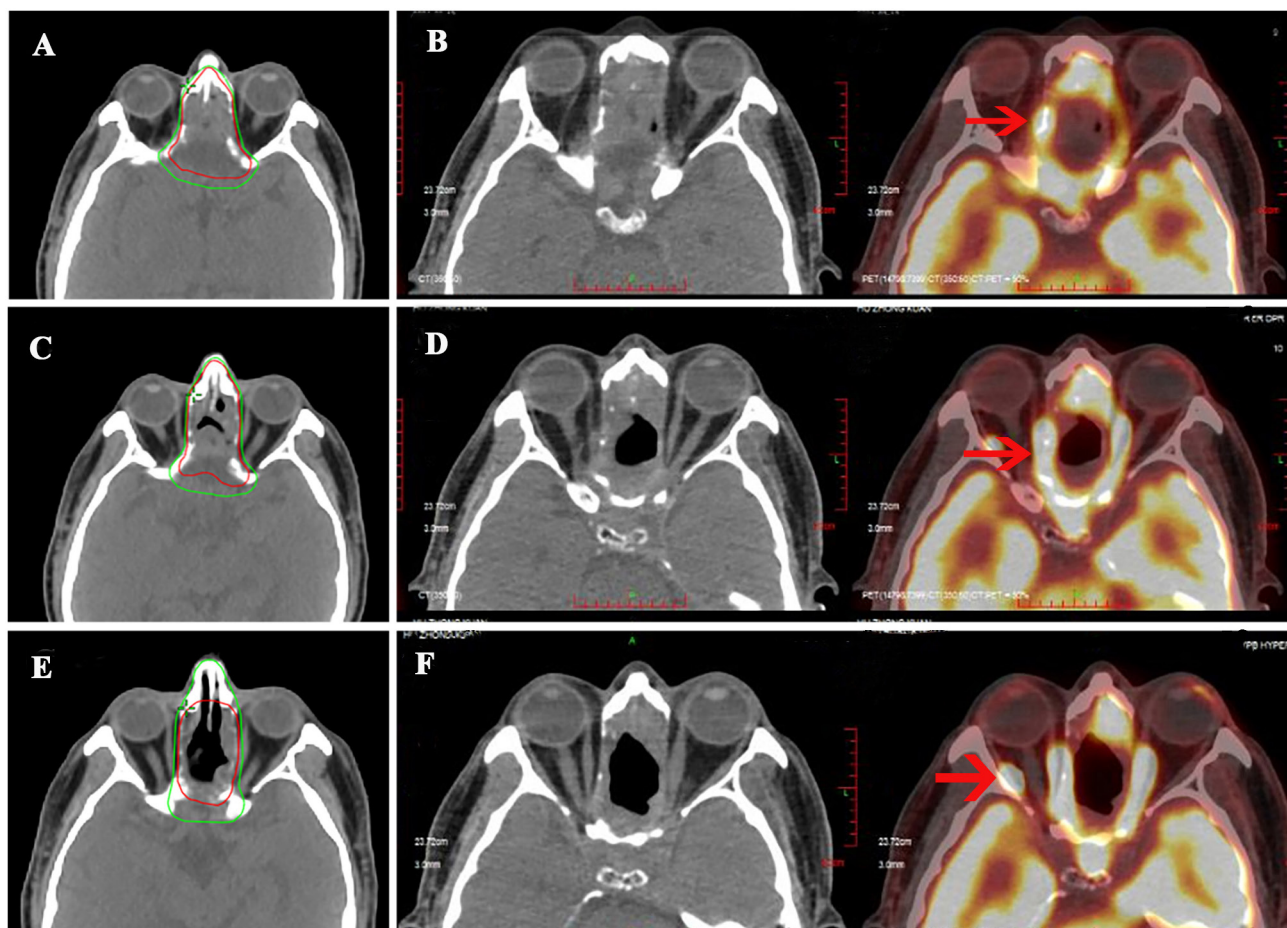

Supplement: Supplementary file 1 [file downloadSupplementary]
